# Supplementary material
Source: PubMed Central journal article supplement (PMC2891230)
Supplement: NIHMS198602-supplement-Supp1.pdf [file NIHMS198602-supplement-Supp1.pdf]

## Supplement Material

**Supplemental Table I. Distribution of insulin-like growth factor-1 (IGF-1), IGF binding protein-3 (IGFBP-3) and their ratio by age and sex**

| Age group,<br>years | N    | IGF-1, ng/ml |        | IGFBP-3, ng/ml |           | IGF-1:IGFBP-3 ratio     |                         |
|---------------------|------|--------------|--------|----------------|-----------|-------------------------|-------------------------|
|                     |      | Men          | Women  | Men            | Women     | Men                     | Women                   |
| All                 | 3977 | 128±39       | 129±45 | 2905±1079      | 3097±1096 | 0.044<br>(0.034, 0.057) | 0.042<br>(0.032, 0.054) |
| 19-29               | 482  | 166±48       | 168±58 | 3224±1028      | 3288±1124 | 0.052<br>(0.041, 0.067) | 0.049<br>(0.039, 0.065) |
| 30-39               | 1407 | 133±36       | 136±41 | 2985±1075      | 3192±1088 | 0.044<br>(0.035, 0.057) | 0.043<br>(0.033, 0.054) |
| 40-49               | 1537 | 119±32       | 119±37 | 2829±1070      | 2990±1065 | 0.043<br>(0.033, 0.055) | 0.040<br>(0.031, 0.052) |
| 50-59               | 523  | 109±33       | 107±38 | 2638±1057      | 3002±1134 | 0.042<br>(0.034, 0.053) | 0.034<br>(0.027, 0.047) |

|       |    |        |       |           |           |                         |                         |
|-------|----|--------|-------|-----------|-----------|-------------------------|-------------------------|
| 60-72 | 28 | 116±31 | 92±28 | 2710±1341 | 2541±1119 | 0.051<br>(0.033, 0.061) | 0.036<br>(0.032, 0.043) |
|-------|----|--------|-------|-----------|-----------|-------------------------|-------------------------|

---

IGF-1, insulin-like growth factor-1; IGFBP-3, insulin-like growth factor binding protein-3

Values are mean±SD for IGF-1 and IGFBP-3; and median (25<sup>th</sup>, 75<sup>th</sup> percentile) for the ratio of IGF-1:IGFBP-3.

To calculate the molar ratio of IGF-1 to IGFBP-3 using molar weights of 7.65 kDa for IGF-1 and 30.5 kDa for IGFBP-3, multiply ratio values by 3.987
